# Supplementary material for: Visible-light-driven photocatalytic degradation of safranin-T dye using functionalized graphene oxide nanosheet (FGS)/ZnO nanocomposites
Source: Royal Society of Chemistry journal article supplement (doi:10.1039/c8ra02237b), 2018-01-01
Supplement: c8ra02237b1.pdf [file c8ra02237b1.pdf]

## Electronic supplementary information

### Visible-light-driven photocatalytic degradation of safranin-T dye using functionalized graphene oxide nanosheets FGS/ZnO nanocomposites

Bhavani P. Nenavathu,<sup>\*a</sup> Syam Kandula,<sup>b</sup> and Swati Verma,<sup>c</sup>

<sup>a</sup>Department of Applied Sciences and Humanities, Indira Gandhi Delhi Technical University For Women, Delhi, 110006, India.

<sup>b</sup>Advanced Materials Institute for BIN Convergence Technology (BK21 plus Global Program), Department of BIN Convergence Technology, Chonbuk National University, 567, Baekje-daero, Deokjin-gu, Jeonju-si, Jeollabuk-do, 54896, Republic of Korea

<sup>c</sup>Department of Chemical Engineering, Indian Institute of Technology Kanpur, Kanpur-208016, India

\*E-mail: bhavaniprasadnaik@igdtuw.ac.in, Tel: +91-11-23900275

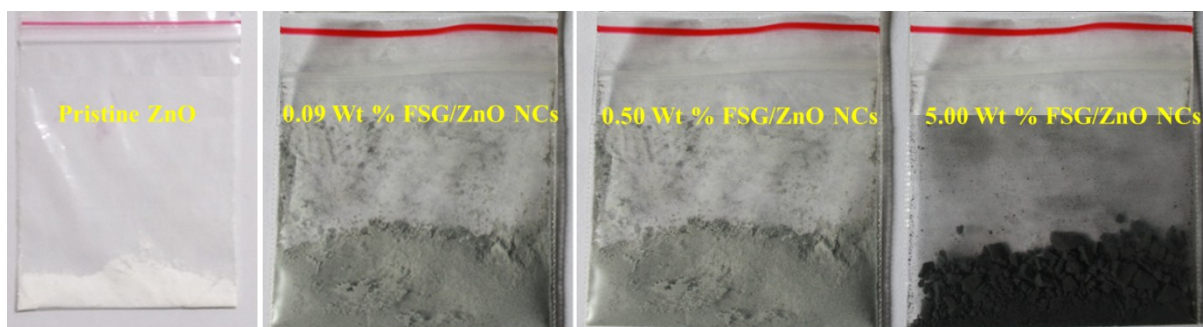

**Fig. S1** The photographs of pristine ZnO and various FGS/ZnO NCs (0.09 wt %, 0.50 wt %, and 5.00 wt %).

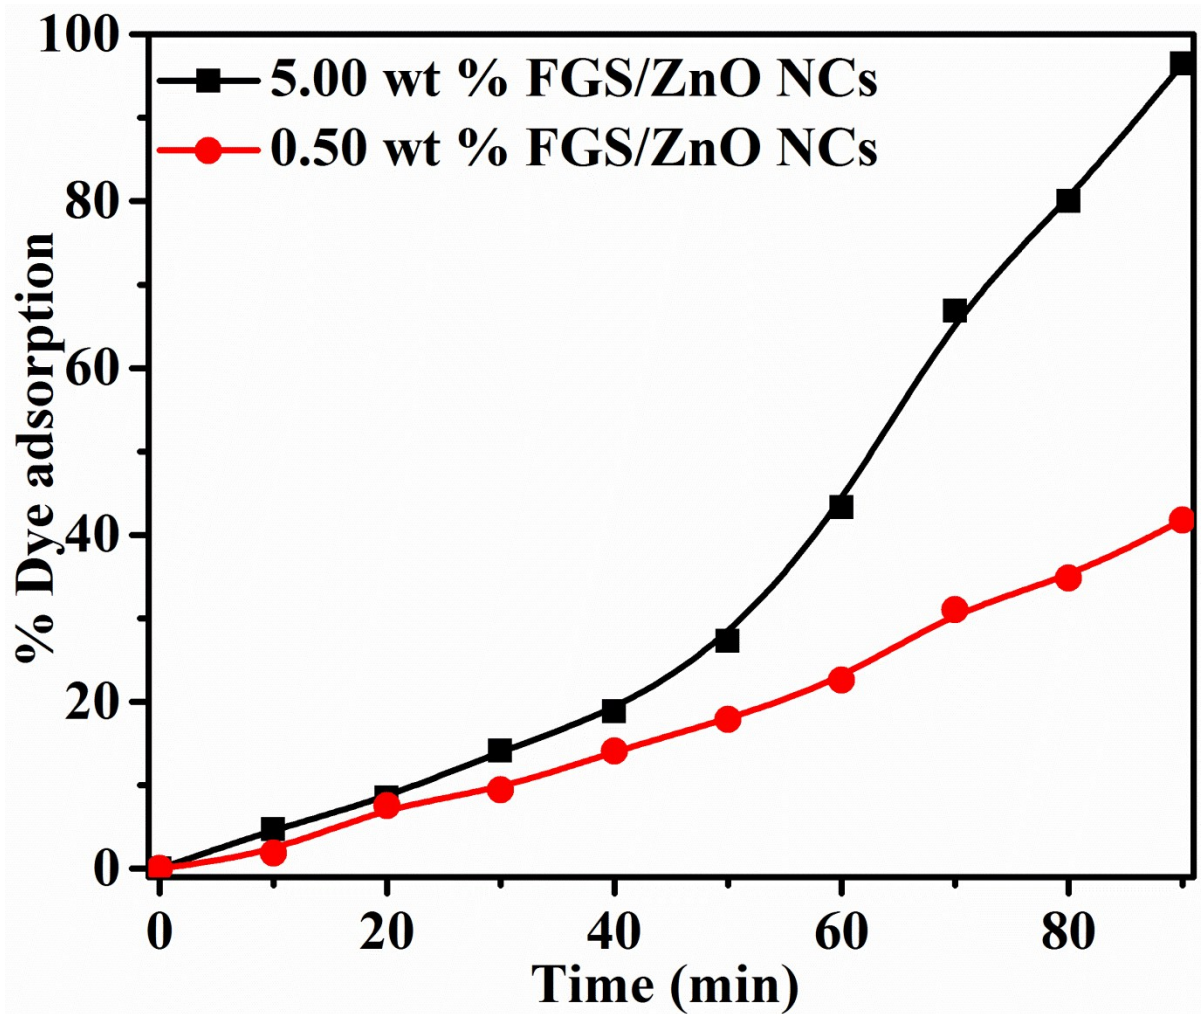

Fig. S2 The effect of FGS concentration in FGS/ZnO NCs on adsorption of safranin-T dye.

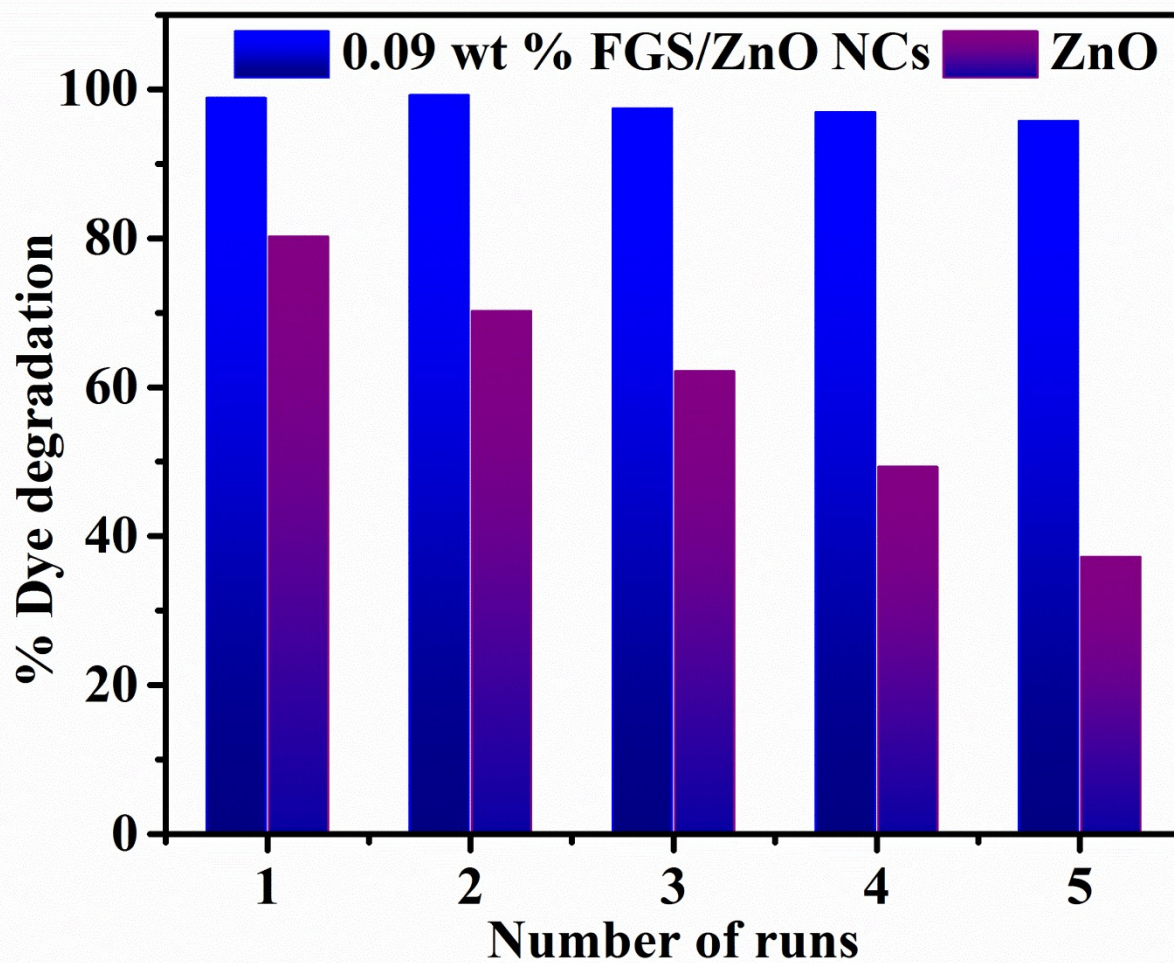

**Fig. S3** The recyclability (photostability) of the FGS/ZnO NCs (0.09 wt % FGS/ZnO NCs) and pristine ZnO NPs for the photodegradation of safranin-T dye.

**Table S1.** The photodegradation efficiency of various ZnO/graphene or ZnO/graphene oxide composite photocatalysts.

| Photocatalyst | Particle size of ZnO (nm)   | Dye                           | Degradation efficiency (%) | Ref. no.     |
|---------------|-----------------------------|-------------------------------|----------------------------|--------------|
| ZnO-rGO       | 150                         | Rhodamine B                   | 92.9                       | 1            |
| ZnO/FG        | ~ 7                         | Rhodamine 6G                  | 96.0                       | 2            |
| ZnO/G         | 10–20                       | Rhodamine B                   | 100.0                      | 3            |
| ZnO-rGO       | --                          | Methylene blue                | 88.0                       | 4            |
| ZnO/GO        | 500–1000                    | Methylene blue                | 98.1                       | 5            |
| ZnO/GO        | ~ 20–40                     | Crystal violet                | 95.0                       | 6            |
| ZnO/GO        | 100–200                     | Methylene blue/ Methyl orange | 98.0                       | 7            |
| ZnO/G         | 16–22                       | Methylene blue/ Methyl orange | 100.0                      | 8            |
| ZnO rods/rGO  | Length 180, and diameter 16 | Orange II                     | 99.0                       | 9            |
| ZnO NPs@GO    | 15 ± 5 nm                   | Methylene blue                | 98.5                       | 10           |
| GO/ZnO NRs    | Diameter 50–100             | Methylene blue                | 90.0                       | 11           |
| ZnO/G         | 10                          | Rhodamine B                   | 74.0                       | 12           |
| ZnO/G         | 10–20                       | Methylene blue                | 97.0                       | 13           |
| ZnO/G         | 90–120                      | Malachite green               | 78.0                       | 14           |
| ZnO/G         | 22 ± 6                      | Methylene blue                | 70.0                       | 15           |
| ZnO/G         | 6                           | Methylene blue                | 100.0                      | 16           |
| ZnO/G         | 13                          | Trypan blue                   | 98.8                       | 17           |
| FGS/ZnO       | 10–20                       | Safranin-T                    | 100.0                      | Current work |

**Table S2.** The VB and CB band positions of various FGS/ZnO NCs and bare ZnO NPs.

| Sample Name           | Band gap ( $E_g$ , eV) | $E_{VB}$ (eV) | $E_{CB}$ (eV) |
|-----------------------|------------------------|---------------|---------------|
| Bare ZnO NPs          | 3.16                   | 2.98          | - 0.18        |
| 0.05 wt % FGS/ZnO NCs | 3.13                   | 2.97          | - 0.16        |
| 0.09 wt % FGS/ZnO NCs | 3.10                   | 2.95          | - 0.15        |
| 0.10 wt % FGS/ZnO NCs | 3.12                   | 2.96          | - 0.16        |
| 0.50 wt % FGS/ZnO NCs | 3.18                   | 2.99          | - 0.19        |
| 5.00 wt % FGS/ZnO NCs | 3.27                   | 3.04          | - 0.23        |

## Supplementary references

1. X. Li, Q. Wang, Y. Zhao, W. Wu, J. Chen and H. Meng, *J. Colloid Interface Sci.*, 2013, **411**, 69–75.
2. Y. Yang, L. Ren, C. Zhang, S. Huang and T. Liu, *ACS Appl. Mater. Interfaces*, 2011, **3**, 2779–2785.
3. B. Li and H. Cao, *J. Mater. Chem.*, 2011, **21**, 3346–3349.
4. T. Lv, L. Pan, X. Liu, T. Lu, G. Zhu and Z. Sun, *J. Alloys Compd.*, 2011, **509**, 10086–10091.
5. B. Li, T. Liu, Y. Wang and Z. Wang, *J. Colloid Interface Sci.*, 2012, **377**, 114–121.
6. S. Ameen, A. Shaheer, H. K. Seo and H. S. Shin, *Mater. Lett.*, 2013, **100**, 261–265.
7. S. Liu, H. Sun, A. Suvorova and S. Wang, *Chem. Eng. J.*, 2013, **229**, 533–539.
8. M. Ahmad, E. Ahmed, Z. L. Hong, J. F. Xu, N. R. Khalid, A. Elhissi and W. A. Ahmed, *Appl. Surf. Sci.*, 2013, **274**, 273–281.
9. H. Moussa, E. Girod, K. Mozet, H. Alem, G. Medjahdi and R. Schneider, *Appl. Catal. B Environ.*, 2016, **185**, 11–21.
10. R. Atchudan, T. N. J. I. Edison, S. Perumal, D. Karthikeyan and Y. R. Lee, *J. Photochem. Photobiol. B Biol.*, 2016, **162**, 500–510.
11. E. Rokhsat and O. Akhavan, *Appl. Surf. Sci.*, 2016, **371**, 592–595.
12. Q. Zhang, C. Tian, A. Wu, T. Tan, L. Sun, L. Wang and H. A. Fu, *J. Mater. Chem.*, 2012, **22**, 11778–11784.
13. X. Bai, L. Wang, R. Zong, Y. Lv, Y. Sun and Y. Zhu, *Langmuir*, 2013, **29**, 3097–3105.
14. N. P. Herring, S. H. Almahoudi, C. R. Olson and M. S. El-Shall, *J. Nanoparticle Res.* 2012, **14**, 1277–1285.
15. T. Kavitha, A. I. Gopalan, K. P. Lee and S. Y. Park, *Carbon*, 2012, **50**, 2994–3000.
16. D. Fu, G. Han, F. Yang, T. Zhang, Y. Chang and F. Liu, *Appl. Surf. Sci.* 2013, **283**, 654–659.
17. S. Verma and R. K. Dutta, *J. Environ Chem Eng.*, 2017, **5**, 4776–87.
